# Supplementary material for: A Novel Artificially Humanized Anti-Cripto-1 Antibody Suppressing Cancer Cell Growth
Source: PubMed Central journal article supplement (PMC7915030; doi:10.3390/ijms22041709), 2021-02-08
Supplement: ijms-22-01709-s001.pdf [file ijms-22-01709-s001.pdf]

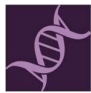

### Supplementary Materials:

**Table S1.** Table shows binding strength detected in the conditioned medium.

| Clone No.          | Response* <sup>2</sup> x10 <sup>-1</sup> | Kdis* <sup>3</sup><br>x10 <sup>-2</sup> /s |
|--------------------|------------------------------------------|--------------------------------------------|
| 8                  | 5.52                                     | 1.84                                       |
| 35                 | 4.84                                     | 1.86                                       |
| 90                 | 4.70                                     | 1.96                                       |
| 212                | 5.99                                     | 2.09                                       |
| 224                | 5.00                                     | 1.91                                       |
| 226                | 4.90                                     | 1.94                                       |
| 242                | 4.80                                     | 1.87                                       |
| 292                | 4.20                                     | 2.07                                       |
| 331                | 3.80                                     | 1.81                                       |
| N.C.* <sup>1</sup> | -0.41                                    | -                                          |

\*1: conditioned medium of non-transformed ExpiCHO-S cells.

\*2: response calculated from the time window entered in the Steady State Analysis section of OCTET system.

\*3: kdis (1/s) value corresponds the rate of dissociation.

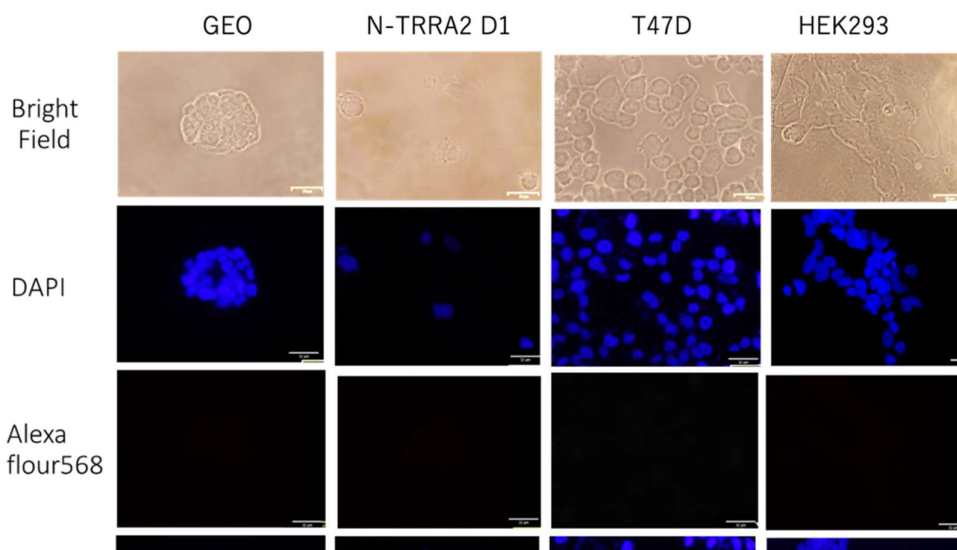

**Figure S1.** Negative control of cell staining. Cells were stained with a secondary antibody, Alexa flour568 anti-human antibody. Scale bars = 32  $\mu$ m.
